# Supplementary material for: Potential of rice straw biochar, sulfur and ryegrass (Lolium perenne L.) in remediating soil contaminated with nickel through irrigation with untreated wastewater
Source: PeerJ. 2020 Jun 12;8:e9267. doi: 10.7717/peerj.9267 (PMC7295020; doi:10.7717/peerj.9267)
Supplement: Data S1 [file peerj-08-9267-s001.xlsx]

## Sheet: Incubation experiment
							The incubation Experiment
Rep	Time	Biochar	Sulfur	Ex-Ni2+
1	1	0	0	6.7				Rep= Replicates
1	1	0	1	6.4				Time 1= 1 day
1	1	1	0	5.92				Time 2= 7 days
1	1	1	1	6				Time 3= 14 days
1	1	2	0	5.35				Time 4= 28 days
1	1	2	1	5.37				Time 5= 56 days
1	2	0	0	6.45				Biochar 0= 0 (gkg-1)
1	2	0	1	6.3				Biochar 1= 10 (gkg-1)
1	2	1	0	4.9				Biochar 2= 20 (gkg-1)
1	2	1	1	5.2				Sulfur 0= 0 (gkg-1)
1	2	2	0	4.4				Sulfur 1= 5 (gkg-1)
1	2	2	1	4.5				Ex-Ni2+= Extractable Ni2+ content (mgKg-1)
1	3	0	0	6.07
1	3	0	1	5.98
1	3	1	0	4.85
1	3	1	1	4.8
1	3	2	0	3.6
1	3	2	1	3.5
1	4	0	0	5.85
1	4	0	1	5.87
1	4	1	0	4.32
1	4	1	1	4.4
1	4	2	0	3.16
1	4	2	1	3.29
1	5	0	0	5.28
1	5	0	1	5.37
1	5	1	0	2.62
1	5	1	1	2.88
1	5	2	0	1.59
1	5	2	1	1.99
2	1	0	0	6.77
2	1	0	1	6.5
2	1	1	0	5.97
2	1	1	1	5.87
2	1	2	0	5.37
2	1	2	1	5.38
2	2	0	0	6.47
2	2	0	1	6.45
2	2	1	0	4.9
2	2	1	1	5.15
2	2	2	0	4.55
2	2	2	1	4.6
2	3	0	0	6.05
2	3	0	1	6.01
2	3	1	0	4.83
2	3	1	1	4.81
2	3	2	0	3.57
2	3	2	1	3.45
2	4	0	0	5.79
2	4	0	1	5.92
2	4	1	0	4.3
2	4	1	1	4.38
2	4	2	0	3.17
2	4	2	1	3.34
2	5	0	0	5.26
2	5	0	1	5.42
2	5	1	0	2.6
2	5	1	1	2.91
2	5	2	0	1.62
2	5	2	1	2.01
3	1	0	0	6.72
3	1	0	1	6.7
3	1	1	0	5.97
3	1	1	1	5.8
3	1	2	0	5.32
3	1	2	1	5.35
3	2	0	0	6.55
3	2	0	1	6.47
3	2	1	0	4.87
3	2	1	1	5.17
3	2	2	0	4.3												ti
3	2	2	1	4.3
3	3	0	0	6.15
3	3	0	1	5.95
3	3	1	0	4.82
3	3	1	1	4.78
3	3	2	0	3.55
3	3	2	1	3.55
3	4	0	0	5.8
3	4	0	1	5.95
3	4	1	0	4.32
3	4	1	1	4.35
3	4	2	0	3.21
3	4	2	1	3.27
3	5	0	0	5.31
3	5	0	1	5.45
3	5	1	0	2.65
3	5	1	1	2.89
3	5	2	0	1.63
3	5	2	1	2.04

## Sheet: Greenhouse experiment
			Ni2+-uptake		Ni2+-uptake		The greenhouse experiment
Rep	Biochar	Sulfur	1st mow		2nd mow
1	0	0	0.698		0.109
1	0	1	0.823		0.121
1	1	0	0.508		0.104
1	1	1	0.608		0.103			Biochar 0= 0 (gkg-1)
1	2	0	0.425		0.089			Biochar 1= 10 (gkg-1)
1	2	1	0.489		0.091			Biochar 2= 20 (gkg-1)
2	0	0	0.701		0.107			Sulfur 0= 0 (gkg-1)
2	0	1	0.829		0.12			Sulfur 1= 5 (gkg-1)
2	1	0	0.51		0.102			1st mow= the 45th day of the cultivation
2	1	1	0.61		0.111			2nd mow= the 90th day of the cultivation
2	2	0	0.429		0.088
2	2	1	0.492		0.094
3	0	0	0.702		0.105
3	0	1	0.825		0.122
3	1	0	0.512		0.103
3	1	1	0.605		0.117
3	2	0	0.431		0.087
3	2	1	0.495		0.09
